# Supplementary material for: Generative adversarial network constrained multiple loss autoencoder: A deep learning‐based individual atrophy detection for Alzheimer's disease and mild cognitive impairment
Source: PubMed Central journal article supplement (PMC9875916; doi:10.1002/hbm.26146), 2022-11-17
Supplement: HBM-44-1129-s001.pdf [file HBM-44-1129-s001.pdf]

1 **Supplementary Appendix**

2 Supplementary Figures:

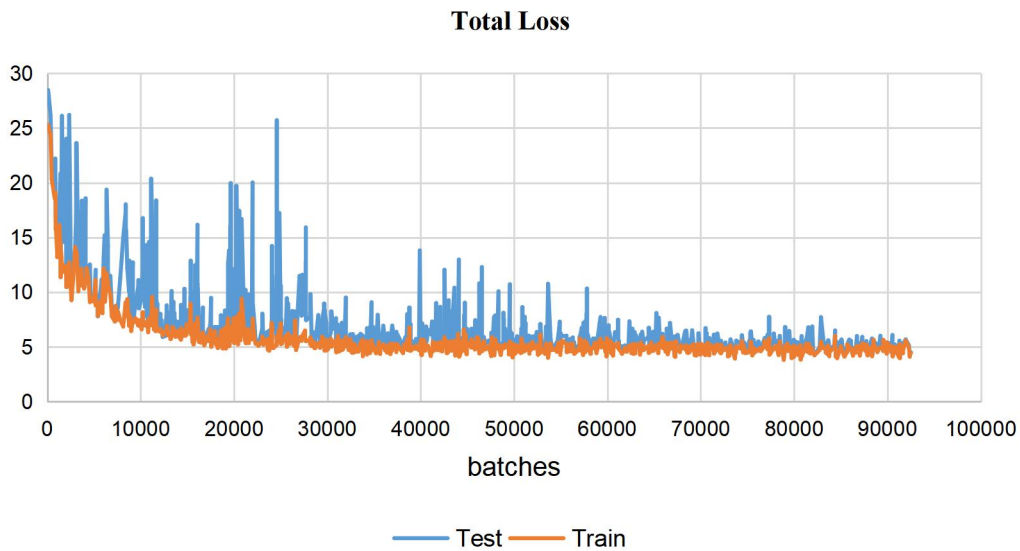

3

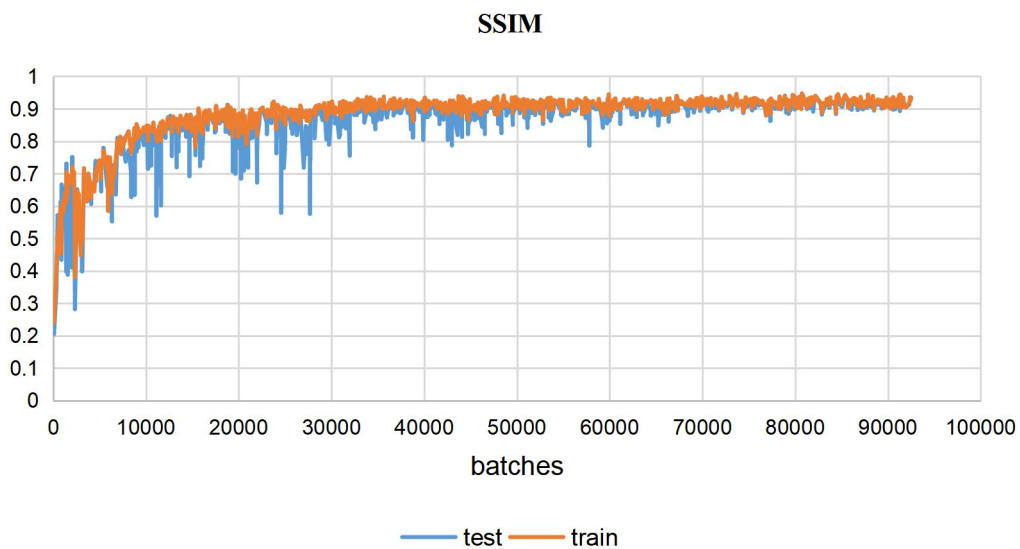

4

5 **Supplementary Figure 1** One of the training procedures of GANCMLE with L3 loss. After 70000  
6 batches if training the loss is almost stable.

7

8

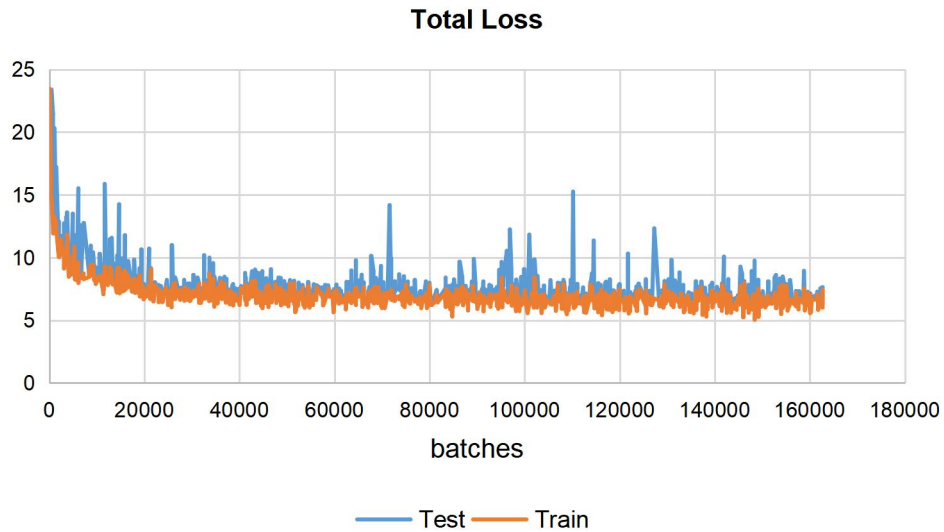

9

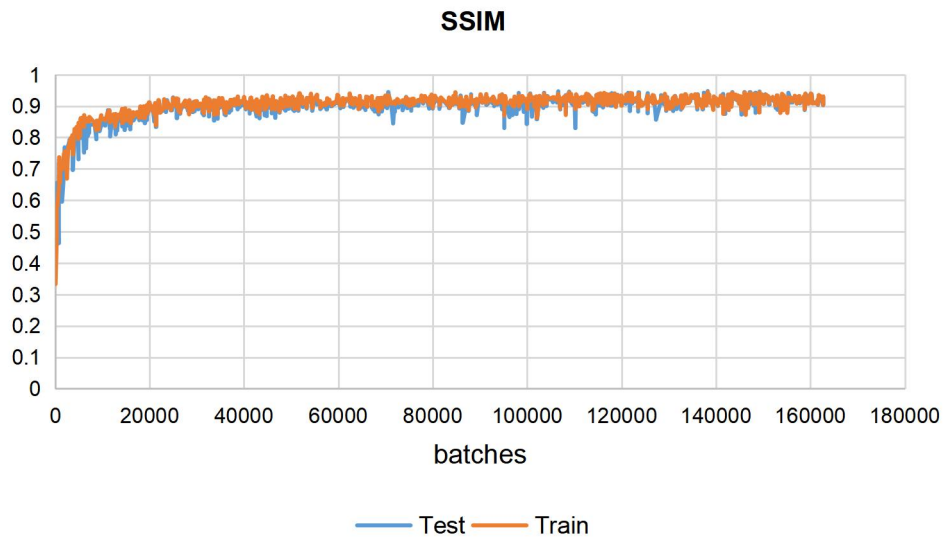

10

11 **Supplementary Figure 2** One of the training procedures without L3 loss. The loss is worse and  
 12 oscillated greater than the above loss.

13

14

15

16

17

18

19

20

21

22

23

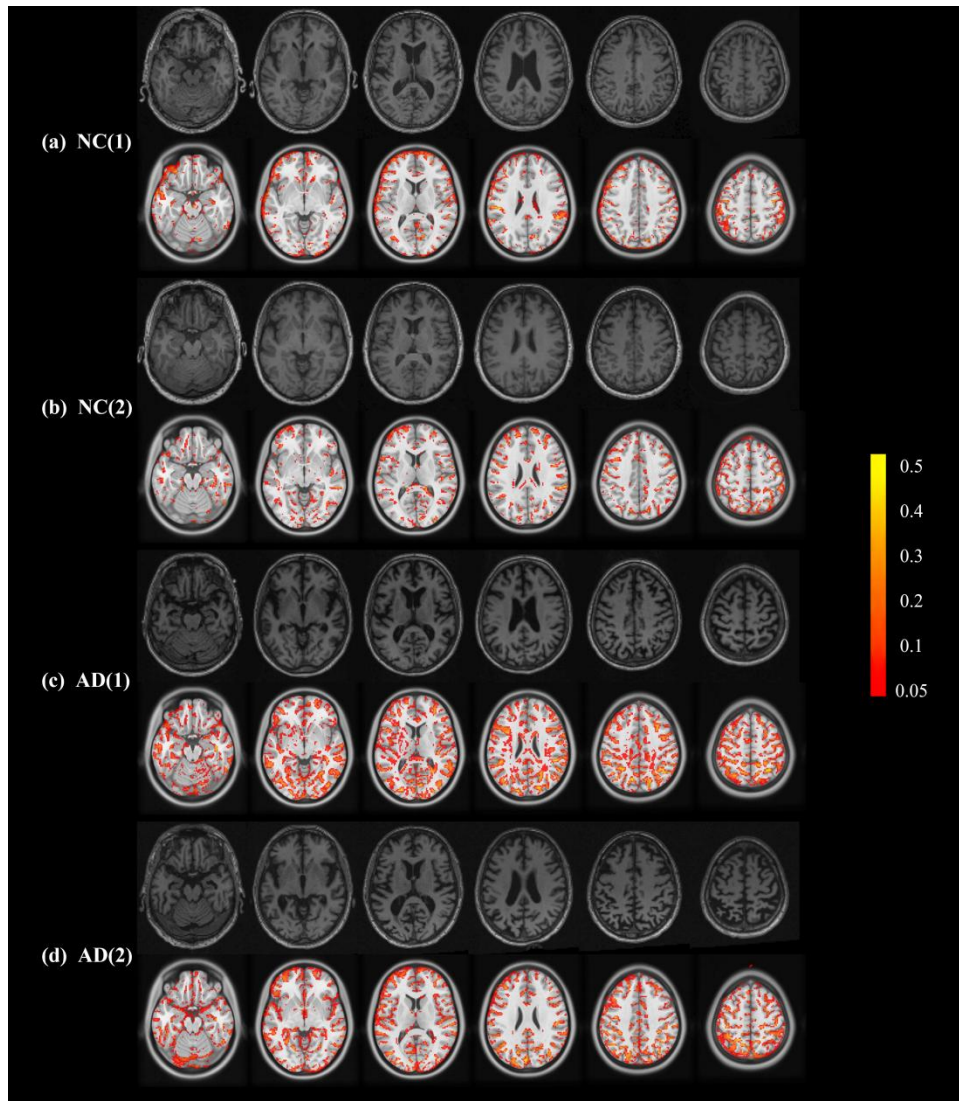

24

25 [Supplementary Figure 3 Individual generated images and their corresponding residual images for NC](#)

26 [and AD.](#)

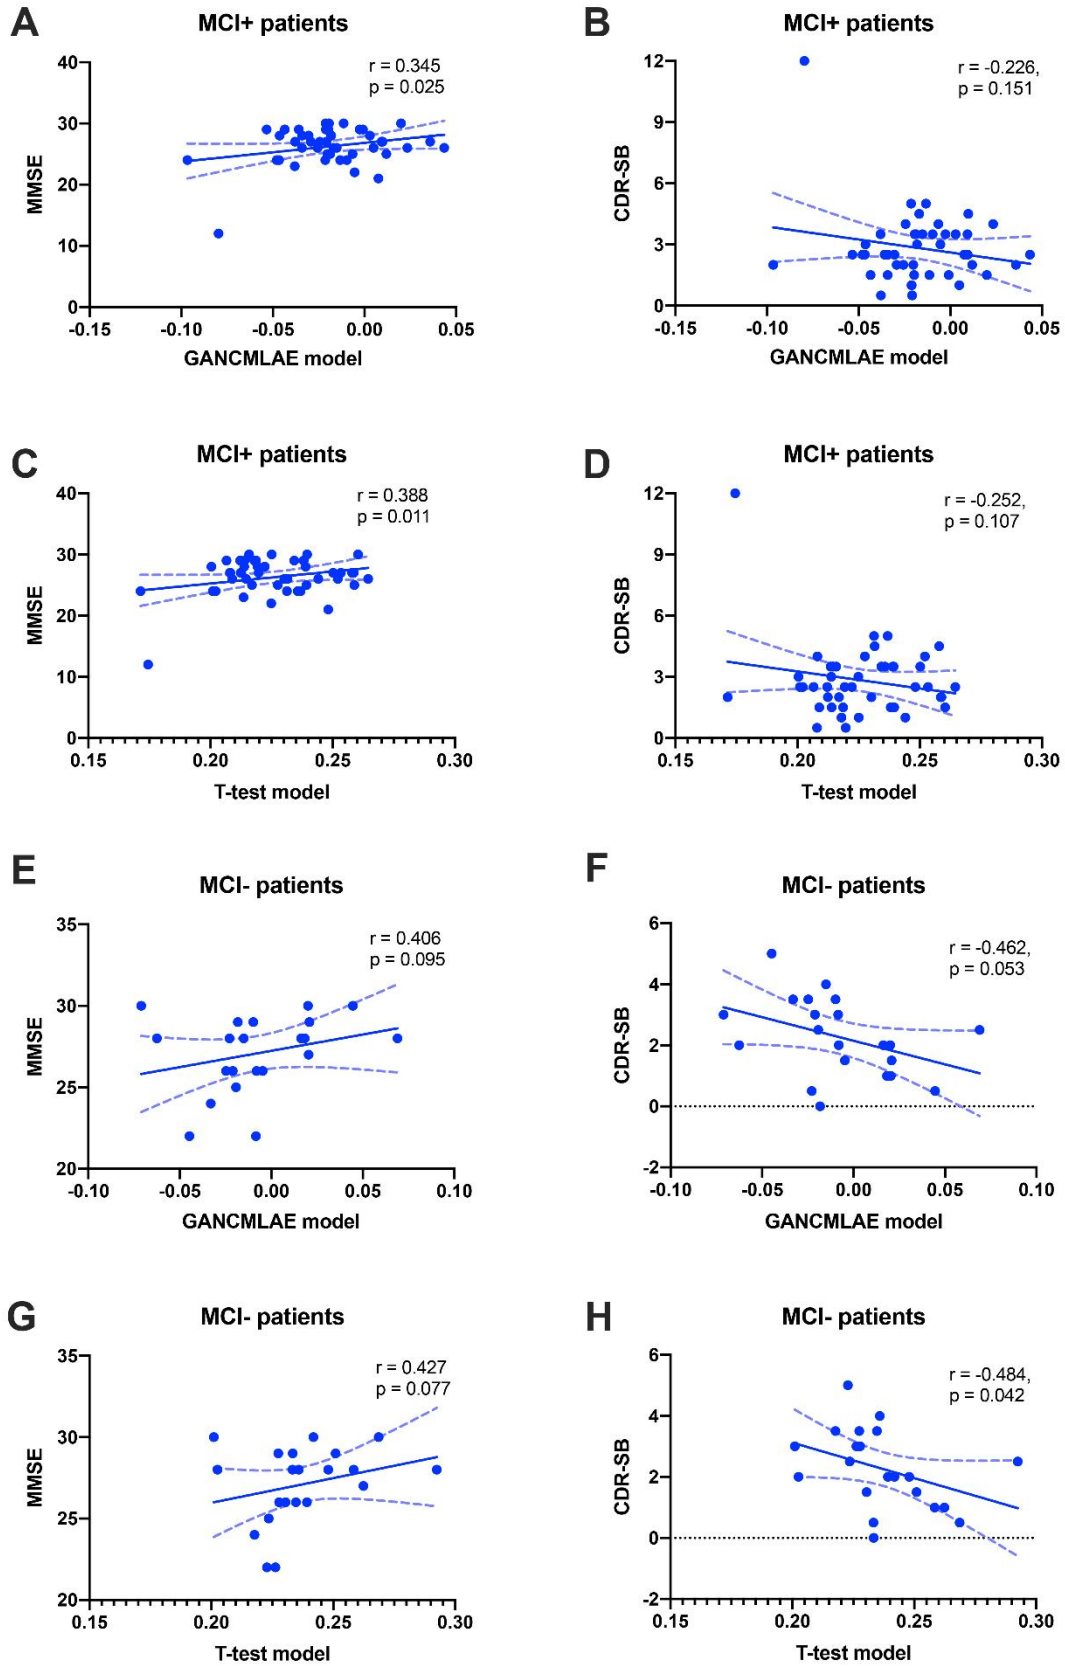

27

28 **Supplementary Figure 4** The association of the two models with MMSE and CDR-SB in the MCI

29 subgroups.

30 **Supplementary Table1 SSIM of NCs in Xuanwu cohort (NC3 group)**

| <b>subjects</b> | <b>mean SSIM</b> | <b>subjects</b> | <b>mean SSIM</b> |
|-----------------|------------------|-----------------|------------------|
| sub001          | 0.931624         | sub054          | 0.932838         |
| sub002          | 0.931481         | sub055          | 0.930494         |
| sub003          | 0.932873         | sub056          | 0.928279         |
| sub004          | 0.933612         | sub057          | 0.931777         |
| sub005          | 0.926053         | sub058          | 0.936816         |
| sub006          | 0.931054         | sub059          | 0.936124         |
| sub007          | 0.934149         | sub060          | 0.936343         |
| sub008          | 0.934124         | sub061          | 0.932032         |
| sub009          | 0.932226         | sub062          | 0.931678         |
| sub010          | 0.929703         | sub063          | 0.9349           |
| sub011          | 0.937052         | sub064          | 0.938053         |
| sub012          | 0.933672         | sub065          | 0.929941         |
| sub013          | 0.936543         | sub066          | 0.937585         |
| sub014          | 0.933489         | sub067          | 0.924162         |
| sub015          | 0.940298         | sub068          | 0.934372         |
| sub016          | 0.935456         | sub069          | 0.935235         |
| sub017          | 0.936207         | sub070          | 0.934333         |
| sub018          | 0.929376         | sub071          | 0.935294         |
| sub019          | 0.932865         | sub072          | 0.934234         |
| sub020          | 0.924912         | sub073          | 0.937425         |
| sub021          | 0.934792         | sub074          | 0.93106          |
| sub022          | 0.9334           | sub075          | 0.935755         |
| sub023          | 0.934979         | sub076          | 0.935057         |
| sub024          | 0.930703         | sub077          | 0.936376         |
| sub025          | 0.937122         | sub078          | 0.93378          |
| sub026          | 0.935989         | sub079          | 0.937833         |
| sub027          | 0.93369          | sub080          | 0.939946         |
| sub028          | 0.930331         | sub081          | 0.94212          |
| sub029          | 0.925796         | sub082          | 0.927253         |
| sub030          | 0.933391         | sub083          | 0.929888         |
| sub031          | 0.934427         | sub084          | 0.938013         |
| sub032          | 0.935061         | sub085          | 0.930511         |
| sub033          | 0.917336         | sub086          | 0.934412         |
| sub034          | 0.9163           | sub087          | 0.938577         |
| sub035          | 0.929218         | sub088          | 0.937138         |
| sub036          | 0.931947         | sub089          | 0.934694         |
| sub037          | 0.932933         | sub090          | 0.93507          |
| sub038          | 0.934362         | sub091          | 0.934974         |
| sub039          | 0.935608         | sub092          | 0.935447         |
| sub040          | 0.937247         | sub093          | 0.934863         |
| sub041          | 0.929544         | sub094          | 0.932697         |

|        |          |        |          |
|--------|----------|--------|----------|
| sub042 | 0.934104 | sub095 | 0.935275 |
| sub043 | 0.934152 | sub096 | 0.931209 |
| sub044 | 0.934055 | sub097 | 0.934736 |
| sub045 | 0.934655 | sub098 | 0.939306 |
| sub046 | 0.935775 | sub099 | 0.929284 |
| sub047 | 0.938808 | sub100 | 0.938543 |
| sub048 | 0.930787 | sub101 | 0.93631  |
| sub049 | 0.928477 | sub102 | 0.934384 |
| sub050 | 0.927781 | sub103 | 0.932566 |
| sub051 | 0.926033 | sub104 | 0.936483 |
| sub052 | 0.930109 | sub105 | 0.92689  |
| Sub053 | 0.929246 |        |          |

---

31

32

33

34 **Supplementary Table2** Brain regional atrophy in aMCI and naMCI based on the residual model and t-  
 35 test model

| GANCMLE (aMCI)                           |              | T-test (aMCI)                          |              |
|------------------------------------------|--------------|----------------------------------------|--------------|
| Cluster location (AAL template)          | Cluster size | Cluster location (AAL template)        | Cluster size |
| Thalamus_R, Pallidum_R, Putamen_R,       | 1003         | Cerebelum_3_R                          | 49           |
| Rectus_R, Caudate_R, Frontal_Sup_Orb_R   |              | Lingual_R                              |              |
| Temporal_Pole_Mid_L, Temporal_Inf_L      | 63           | ParaHippocampal_R                      | 12           |
| Temporal_Inf_R, Temporal_Mid_R           | 251          | Hippocampus_L                          | 29           |
| Temporal_Sup_L, Temporal_Mid_L, Heschl_L | 174          | Hippocampus_R                          | 38           |
| Lingual_R, Cerebelum_6_R, Fusiform_R,    | 10759        | Frontal_Mid_R, Frontal_Inf_Tri_R,      | 5003         |
| Precuneus_R, Calcarine_R, Cerebelum_8_R, |              | Frontal_Sup_R, Frontal_Mid_Orb_R,      |              |
| Cerebelum_8_L, Thalamus_L,               |              | Temporal_Mid_R,                        |              |
| Occipital_Mid_L, Temporal_Mid_L,         |              | Frontal_Sup_Medial_R, Temporal_Sup_R,  |              |
| Fusiform_L, Occipital_Mid_R, Cuneus_R,   |              | Frontal_Inf_Orb_R, Frontal_Sup_Orb_R,  |              |
| Temporal_Inf_L, Cerebelum_Crus2_R,       |              | Postcentral_R, Precentral_R, Rectus_R, |              |
| Occipital_Inf_R, ParaHippocampal_R,      |              | Temporal_Inf_R, Frontal_Med_Orb_R,     |              |
| Occipital_Sup_L, Cingulum_Post_L,        |              | Parietal_Sup_R, Frontal_Inf_Oper_R,    |              |
| Occipital_Sup_R, Pallidum_L,             |              | Parietal_Inf_R, Rolandic_Oper_R,       |              |
| Cingulum_Post_R, Calcarine_L,            |              | Cingulum_Ant_R, Temporal_Pole_Sup_R,   |              |
| Cerebelum_Crus1_R, Cerebelum_9_L,        |              | Temporal_Pole_Mid_R                    |              |
| Cerebelum_4_5_R, Putamen_L,              |              |                                        |              |
| Cerebelum_9_R, Hippocampus_L,            |              |                                        |              |
| Cerebelum_6_L, ParaHippocampal_L,        |              |                                        |              |
| Occipital_Inf_L, Temporal_Mid_R,         |              |                                        |              |
| Frontal_Sup_Orb_L, Temporal_Inf_R,       |              |                                        |              |
| Cingulum_Mid_R, SupraMarginal_L          |              |                                        |              |

|                                                                               |     |                                                                                                                                                                                                                              |      |
|-------------------------------------------------------------------------------|-----|------------------------------------------------------------------------------------------------------------------------------------------------------------------------------------------------------------------------------|------|
| Hippocampus_R, ParaHippocampal_R                                              | 232 | Occipital_Mid_L, Angular_L,<br>Occipital_Inf_L, Occipital_Sup_L,<br>Temporal_Mid_L, Parietal_Sup_L,<br>Parietal_Inf_L, Lingual_L, Precuneus_L,<br>Cuneus_L, SupraMarginal_L,<br>Hippocampus_L, Fusiform_L,<br>Temporal_Inf_L | 5523 |
| Frontal_Mid_Orb_L, Frontal_Mid_L,<br>Frontal_Inf_Orb_L                        | 136 | Hippocampus_R, ParaHippocampal_R                                                                                                                                                                                             | 67   |
| SupraMarginal_R, Temporal_Sup_R,<br>Heschl_R                                  | 122 | Calcarine_R                                                                                                                                                                                                                  | 49   |
| Frontal_Inf_Oper_L, Frontal_Inf_Tri_L                                         | 79  | Cuneus_R, Occipital_Sup_R, Calcarine_R                                                                                                                                                                                       | 82   |
| Angular_R, Occipital_Mid_R, Parietal_Sup_R                                    | 188 | Temporal_Sup_L                                                                                                                                                                                                               | 41   |
| Parietal_Sup_R, Postcentral_R, Precentral_R,<br>Frontal_Mid_R, Parietal_Inf_R | 628 | Thalamus_R, Caudate_R                                                                                                                                                                                                        | 59   |
| Parietal_Sup_L, Postcentral_L, Precentral_L                                   | 354 | Precuneus_R                                                                                                                                                                                                                  | 51   |

36

| GANCMLE (naMCI)                                                      | T-test (naMCI) |                                                    |              |
|----------------------------------------------------------------------|----------------|----------------------------------------------------|--------------|
|                                                                      | Cluster size   | Cluster location (AAL template)                    | Cluster size |
| Temporal_Pole_Mid_R, Temporal_Inf_R                                  | 106            | Temporal_Sup_L                                     | 63           |
| Occipital_Mid_R, Occipital_Inf_R, Occipital_Sup_R,<br>Temporal_Mid_R | 281            | Precentral_R,<br>Postcentral_R,<br>Rolandic_Oper_R | 109          |



|                                                             |      |                   |    |
|-------------------------------------------------------------|------|-------------------|----|
| Parietal_Sup_R, Frontal_Mid_R, Postcentral_R, Precentral_R, |      |                   |    |
| Frontal_Inf_Tri_R, Parietal_Inf_R, Frontal_Sup_R,           |      |                   |    |
| Frontal_Inf_Orb_R, Angular_R, Temporal_Pole_Sup_R,          |      | Frontal_Mid_R,    |    |
| Frontal_Inf_Oper_R                                          | 2052 | Frontal_Inf_Tri_R | 82 |
| Frontal_Mid_R                                               | 59   | Occipital_Sup_R   | 67 |
|                                                             |      | Parietal_Sup_R,   |    |
| Lingual_L, Precuneus_L                                      | 88   | Angular_R         | 58 |
| Frontal_Mid_L, Frontal_Sup_L                                | 238  | Parietal_Sup_L    | 55 |
| Frontal_Inf_Oper_L                                          | 47   | Frontal_Sup_R     | 60 |
| Postcentral_L                                               | 90   |                   |    |
| Parietal_Sup_L, Postcentral_L, Precuneus_L, Precentral_L    | 345  |                   |    |
| Supp_Motor_Area_R                                           | 76   |                   |    |
